# Supplementary material for: DO-like events of the penultimate climate cycle: the loess point of view
Source: Copernicus journal article supplement (doi:10.5194/cp-2019-122), 2019-10-01
Supplement: Supplementary file 1 [file cp-2019-122-supplement.pdf]

## 645 Supplementary material

Suppl. Fig. 1. Sites discussed in the text. On the left, records retrieved from the European loess sequences at about 50°N showing paleosols correlated with DO events during the last climate cycle, Harletz site, Mediterranean terrestrial and marine records, North Atlantic marine records and Greenland NGRIP ice core. On the right, Chinese loess and speleothem records. (map from © Google Earth).

650 Suppl. Fig. 2. Correlation between the last two climate cycles from southern Europe loess sequences along the Danube after Antoine et al. (2019)modified). ISp and ISm (this study) are reported on Harletz record. Location of the sites on Fig. 1. .

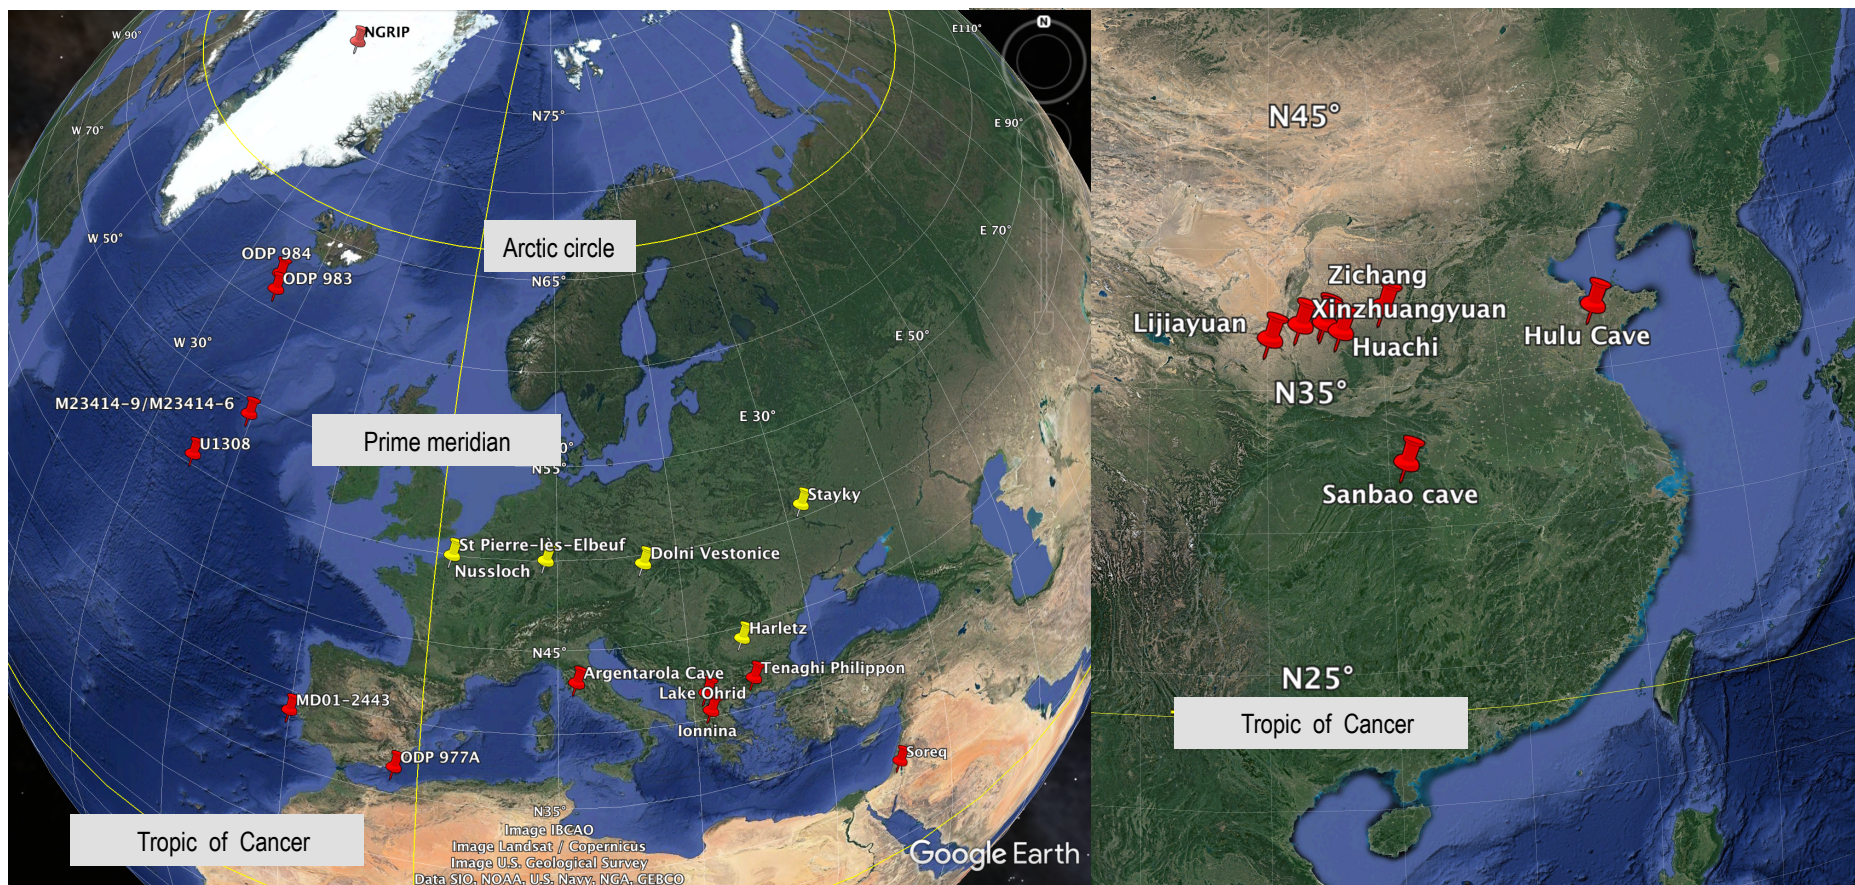

Suppl. Fig. 1

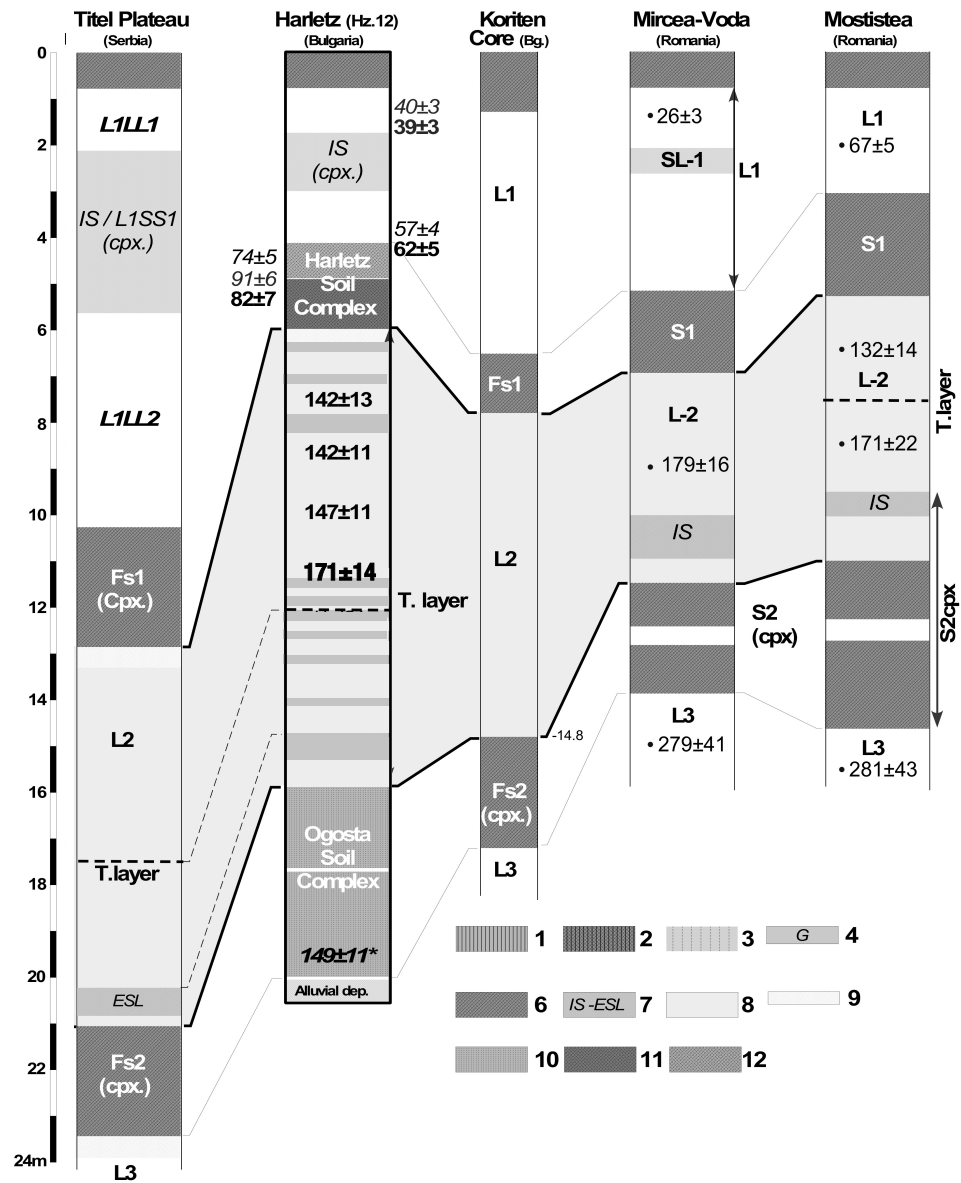

Suppl. Fig. 2
